# Supplementary material for: Efficient Reverse-Engineering of a Developmental Gene Regulatory Network
Source: PubMed Central journal article supplement (PMC3395622; doi:10.1371/journal.pcbi.1002589), 2012-07-12
Supplement: pcbi.1002589.s003.pdf [file pcbi.1002589.s003.pdf]

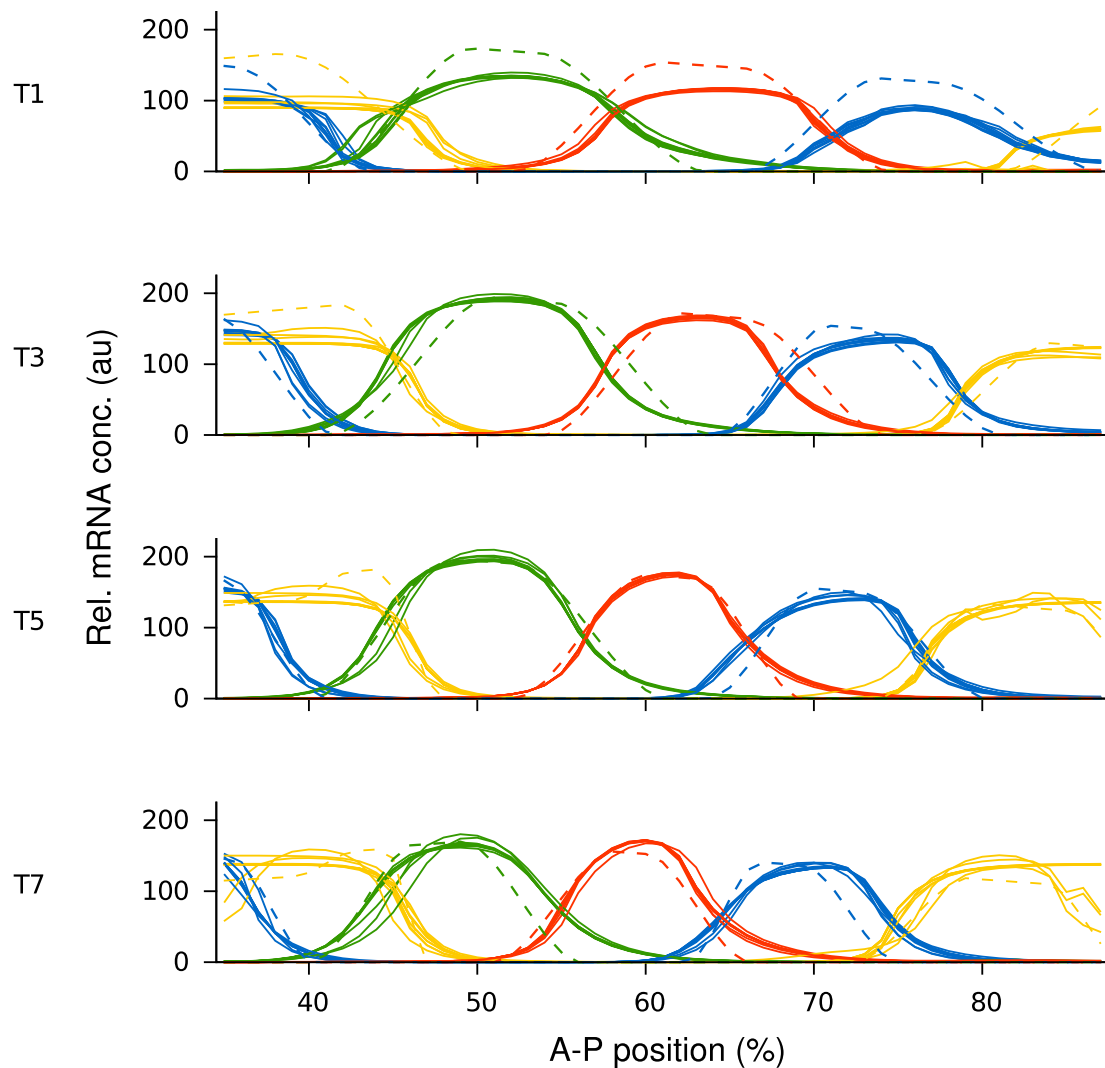

● *hb*   
 ● *Kr*   
 ● *gt*   
 ● *kni*

solid lines: model

dashed lines: data

**Figure S3. OLS mRNA fits: model output versus data.** Plots show model output (solid lines) versus expression data (dashed lines). All 10 selected gene circuits fit with OLS to mRNA data are shown. Horizontal axes represent AP position, where 0% is the anterior pole. Relative mRNA concentrations are in arbitrary units (au). T1/3/5/7 represent time classes during C14A. Time progresses downwards.
