# Supplementary material for: Efficient Reverse-Engineering of a Developmental Gene Regulatory Network
Source: PubMed Central journal article supplement (PMC3395622; doi:10.1371/journal.pcbi.1002589), 2012-07-12
Supplement: pcbi.1002589.s007.pdf [file pcbi.1002589.s007.pdf]

**Table S1: *Drosophila* mRNA vs. protein expression: boundary shifts.** This table shows shifts in boundary positions from a starting point at T1, or, from the earliest appearance of the boundary domain. Numbers are in % A–P position. mRNA expression is shown in black, protein expression in grey. (-) indicates a shift to the anterior (+) a shift to the posterior. *Drosophila* values are calculated from [1]. Single dashes indicate boundaries that are not present at a given time point. Double dashes indicate boundaries that are observable, but were not measured in [1].

| Domain     | <i>hb</i><br>ant | <i>gt</i><br>anterior |              | <i>Kr</i><br>central |              | <i>kni</i><br>abdominal |              | <i>gt</i><br>posterior |                | <i>hb</i><br>posterior |              |
|------------|------------------|-----------------------|--------------|----------------------|--------------|-------------------------|--------------|------------------------|----------------|------------------------|--------------|
| Boundary   | P                | A                     | P            | A                    | P            | A                       | P            | A                      | P              | A                      | P            |
| Time class |                  |                       |              |                      |              |                         |              |                        |                |                        |              |
| <b>T1</b>  | 43.8<br>45.9     | 20.7<br>16.9          | 39.3<br>38.0 | 45.3<br>44.3         | 57.8<br>62.4 | 56.5<br>58.8            | 70.1<br>74.0 | 69.8<br>72.7           | 82.2<br>90.1   | 85.0<br>--             | -<br>-       |
| <b>T2</b>  | +0.6<br>-0.9     | -0.7<br>+1.5          | -1.1<br>-0.1 | -1.0<br>-0.5         | -0.5<br>-1.1 | +1.4<br>-0.2            | 0.0<br>-2.6  | 0.0<br>-1.7            | -2.8<br>-4.1   | -3.8<br>--             | 89.7<br>--   |
| <b>T3</b>  | +1.3<br>-0.1     | -2.0<br>+1.3          | -1.5<br>0    | +0.2<br>-0.1         | +2.0<br>-2.2 | +1.5<br>+0.2            | -0.1<br>-3.3 | -2.3<br>-3.4           | -5.3<br>-7.8   | -3.9<br>80.7           | -2.9<br>93.0 |
| <b>T4</b>  | +3.2<br>+1.3     | -2.5<br>+1.1          | -1.6<br>+0.1 | -1.3<br>-0.1         | 0.0<br>-2.3  | +0.4<br>0.0             | -3.0<br>-4.2 | -2.8<br>-4.0           | -5.2<br>-10.3  | -6.1<br>-0.5           | -4.2<br>-0.6 |
| <b>T5</b>  | +2.1<br>+0.9     | -2.4<br>+1.2          | -1.6<br>+0.3 | -1.4<br>-0.4         | -1.1<br>-2.8 | -0.5<br>+0.4            | -4.1<br>-4.6 | -3.0<br>-4.7           | -5.7<br>-11.6  | -8.1<br>-1.2           | -4.5<br>-1.7 |
| <b>T6</b>  | +2.0<br>+1.3     | -1.9<br>+0.6          | -2.0<br>-0.1 | -1.8<br>-0.7         | -1.4<br>-3.2 | -2.0<br>-0.4            | -5.3<br>-5.0 | -4.2<br>-5.4           | -7.1<br>-12.6  | -10.0<br>-1.0          | -5.6<br>-2.0 |
| <b>T7</b>  | +2.0<br>+1.2     | -1.0<br>-1.6          | -1.7<br>-0.4 | -2.3<br>-1.1         | -5.3<br>-4.5 | -2.0<br>-0.9            | -7.1<br>-5.7 | -5.3<br>-5.9           | -10.1<br>-13.7 | -9.4<br>-1.4           | -6.1<br>-3.5 |
| <b>T8</b>  | +1.2<br>+0.9     | -0.2<br>+1.7          | -2.1<br>-0.1 | -2.6<br>-1.0         | -5.3<br>-5.2 | +1.8<br>-1.6            | -6.5<br>-6.3 | -4.5<br>-6.4           | -9.4<br>-15.2  | -9.5<br>-2.0           | -6.4<br>-4.1 |

[1] Surkova S, Kosman D, Kozlov K, Manu, Myasnikova E, et al. (2008) Characterization of the *Drosophila* segment determination morphome. Dev Biol 313: 844-862
